# Supplementary material for: Habitat Classification Predictions on an Undeveloped Barrier Island Using a GIS-Based Landscape Modeling Approach
Source: MDPI journal article supplement (doi:10.3390/rs14061377), 2022-03-12
Supplement: s1 [file s1]

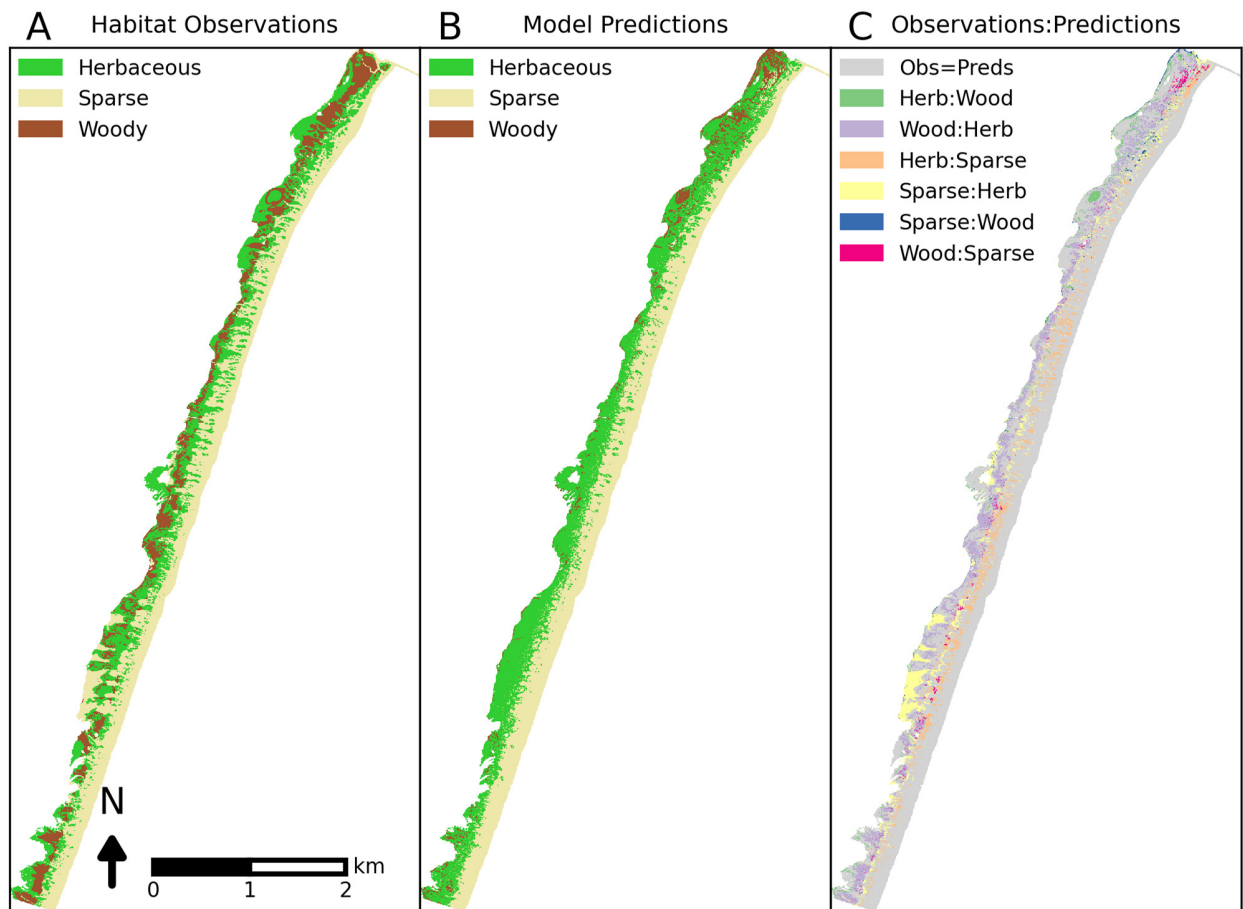

Figure S1. 2012 habitat observations (A), habitat predictions using the equations from Table 4 (B), and model accuracy assessment (C) in which observations were compared to predictions. The legend is in order of habitat confusions that are assumed to be more likely (i.e. Herbaceous:Woody confusions) to habitats confusions that are assumed to be less likely (Woody:Sparse confusions)
